# Supplementary material
Source: PubMed Central journal article supplement (PMC10790075)
Supplement: NIHMS1573451-supplement-Supplemental_Material.pdf [file NIHMS1573451-supplement-Supplemental_Material.pdf]

## **SUPPLEMENTAL MATERIAL**

This appendix has been provided by the authors to give readers additional information about their work.

Supplement to: O'Connor KD, Brophy T, Fonarow GC, Blankstein R, Swaminathan RV, Xu H, Matsouaka RA, Albert NM, Velazquez EJ, Yancy CW, Heidenreich PA, Hernandez AF, DeVore AD. Testing for Coronary Artery Disease in Older Patients with New-Onset Heart Failure: Findings from Get With The Guidelines-Heart Failure. *Circ Heart Fail.* 2020.

**Supplemental Table 1: Billing Codes Utilized to Assess for Testing for Coronary Artery Disease**

| Category                         | Codes                                                                                                                                       | ICD-9-CM                                                     | ICD-10                      |
|----------------------------------|---------------------------------------------------------------------------------------------------------------------------------------------|--------------------------------------------------------------|-----------------------------|
| ECG Stress                       | 93015, 93016, 93017,<br>93018                                                                                                               | 89.41, 89.42, 89.43,<br>89.44                                |                             |
| Nuclear                          | 78469, 78451, 78452,<br>78453, 78454, 78460,<br>78464, 78465, 78466,<br>78468, 78469, 78478,<br>78480                                       | 92.05                                                        | C21XXXX, C22XXX,<br>C23XXXX |
| Stress Echo                      | 93350, 93351, 93352                                                                                                                         |                                                              |                             |
| PET                              | 78459, 78492, 78491                                                                                                                         |                                                              |                             |
| Cardiac MRI                      | 75557, 75559, 75561,<br>75563, 75552, 75553,<br>75554, 75555, 75558,<br>75560, 75562, 75564                                                 | 88.92                                                        | B23XXXX                     |
| Coronary CTA                     | 75574, 75571                                                                                                                                |                                                              | B22XXXX                     |
| Coronary Angiography             | 93454, 93455, 93456,<br>93457, 93458, 93459,<br>93460, 93461, 93563,<br>93564, 93571, 93572,<br>93508, 93539, 93540,<br>93545, 93556, 93564 | 37.22, 37.23, 88.50,<br>88.53, 88.54, 88.55,<br>88.56, 88.57 | B21XXXX                     |
| Coronary Angiography<br>with PCI | 92980, 92981, 92982,<br>92984, 92920, 92921,                                                                                                | 00.06, 17.55, 36.04,<br>36.06, 36.07, 36.09                  | 027-3XX, 02C-3ZZ            |

|                        |                                             |  |                  |
|------------------------|---------------------------------------------|--|------------------|
|                        | 92928, 92929, 92937,<br>92938, 92943, 92944 |  |                  |
| Cardiac Stress Testing |                                             |  | 4A02XM4, 4A12XM4 |

**Supplemental Table 2. Association Between Left Ventricular Ejection Fraction Category and Testing for Coronary Artery Disease**

|                     | Unadjusted OR<br>(95% CI) | <i>P</i> value | Adjusted OR<br>(95% CI) | <i>P</i> value |
|---------------------|---------------------------|----------------|-------------------------|----------------|
| <b>Overall</b>      |                           |                |                         |                |
| HFrEF (LVEF ≤40%)   | 2.68 (2.46, 2.90)         | <0.001         | 2.42 (2.21, 2.65)       | <0.001         |
| HFbEF (LVEF 41-49%) | 1.71 (1.51, 1.93)         | <0.001         | 1.65 (1.44, 1.90)       | <0.001         |
| HFpEF (LVEF ≥50%)   | Reference                 | --             | Reference               | --             |
| Age <80 years       |                           |                |                         | <0.001*        |
| HFrEF (LVEF ≤40%)   | 2.93 (2.61, 3.28)         | <0.001         | 2.89 (2.57, 3.26)       | <0.001         |
| HFbEF (LVEF 41-49%) | 1.77 (1.50, 2.09)         | <0.001         | 1.73 (1.45, 2.06)       | <0.001         |
| HFpEF (LVEF ≥50%)   | Reference                 | --             | Reference               | --             |
| Age ≥80 years       |                           |                |                         |                |
| HFrEF (LVEF ≤40%)   | 2.10 (1.88, 2.35)         | <0.001         | 2.01 (1.79, 2.25)       | <0.001         |
| HFbEF (LVEF 41-49%) | 1.68 (1.41, 2.00)         | <0.001         | 1.58 (1.32, 1.89)       | <0.001         |
| HFpEF (LVEF ≥50%)   | Reference                 | --             | Reference               | --             |

\*Interaction with LVEF category and age <80 years

*CI*, confidence interval; *HFbEF*, heart failure with borderline ejection fraction; *HFpEF*, failure with preserved ejection fraction; *HFrEF*, failure with reduced ejection fraction; *LVEF*, left ventricular ejection fraction; *OR*, odds ratio
